# Supplementary material for: Formation of reactive nitrogen species promoted by iron ions through the photochemistry of a neonicotinoid insecticide
Source: Copernicus journal article supplement (doi:10.5194/acp-24-11943-2024), 2024-10-28
Supplement: Supplementary file 1 [file acp-24-11943-2024-supplement.pdf]

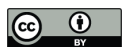

*Supplement of*

## **Formation of reactive nitrogen species promoted by iron ions through the photochemistry of a neonicotinoid insecticide**

**Zhu Ran et al.**

*Correspondence to:* Yanan Hu (huyanan0917@163.com), Sasho Gligorovski (gligorovski@gig.ac.cn), and Jiangping Liu (liujiangping18@mails.ucas.ac.cn)

The copyright of individual parts of the supplement might differ from the article licence.

## 34 **Supplementary Text**

### 35 **Text S1. Ionic analysis at different Fe<sup>3+</sup> concentrations**

36 As depicted in Figure S5, the direct photolysis of NPM produced a large amount of NO<sub>3</sub><sup>-</sup> and NO<sub>2</sub><sup>-</sup> in  
37 the absence of Fe<sup>3+</sup>, and in the presence of Fe<sup>3+</sup> restricted NO<sub>3</sub><sup>-</sup> and NO<sub>2</sub><sup>-</sup> production occurred, which  
38 was consistent with the change of the photolysis rate constant of NPM. NO<sub>2</sub> produced by direct  
39 photolysis of NPM is hydrolyzed in aqueous media to form NO<sub>2</sub><sup>-</sup> and NO<sub>3</sub><sup>-</sup>, and nitrogenous species are  
40 partially dissolved during their release from the liquid to the gas phase. The reaction of NO<sub>x</sub> with O<sub>2</sub><sup>-</sup>  
41 radicals will also produce NO<sub>2</sub><sup>-</sup> and NO<sub>3</sub><sup>-</sup>. The presence of Fe<sup>3+</sup> provides a strong acid environment  
42 (Table S1) and the protonation of NO<sub>2</sub><sup>-</sup> will lead to the release of HONO (Lu et al., 2015; Wang et al.,  
43 2021). Upon irradiation at λ>300 nm, Fe<sup>3+</sup> species (monomeric and dimeric) are known to undergo a  
44 redox process giving rise to Fe(II) and •OH radicals (Bai et al., 2023). Fe<sup>2+</sup> cannot coexist with NO<sub>3</sub><sup>-</sup>,  
45 and NO<sub>2</sub> gas will be produced by redox reaction. In short, the addition of Fe<sup>3+</sup> promotes the conversion  
46 of NO<sub>3</sub><sup>-</sup> and NO<sub>2</sub><sup>-</sup> to HONO and NO<sub>x</sub>. In the presence of high Fe<sup>3+</sup> concentration, the photolysis rate of  
47 NPM showed an increasing trend, and •OH and O<sub>2</sub><sup>-</sup> produced under light irradiation were more  
48 elevated than those produced under low concentration of Fe<sup>3+</sup> (Figure 4), which slightly promoted the  
49 generation of NO<sub>3</sub><sup>-</sup> and NO<sub>2</sub><sup>-</sup>.

### 50 **Text S2. Global simulation of NO<sub>x</sub> and HONO fluxes**

51 We are estimating the amount of NO<sub>x</sub> and HONO fluxes released from NPM chemistry, as a function  
52 of NPM concentration and solar radiation, following Eq-S1, Eq-S2 and Eq-S3, but assuming that the  
53 environmental NPM concentration is three orders smaller (50 μg L<sup>-1</sup>) than the experimental conditions  
54 of 50000 μg L<sup>-1</sup>. The parameterization of HONO and NO<sub>x</sub> productions from NPM photolysis at Fe<sup>3+</sup>  
55 concentration of 0.025 mg L<sup>-1</sup> used in our estimation is based on Eq-S1, Eq-S2 and Eq-S3 (Figure S8  
56 and Figure S9). The estimation is conducted for each of the 561×360 grids at the globe with a  
57 horizontal resolution of 0.5×0.625°, consistent with resolution of the solar radiation data from the  
58 hourly Modern-Era Retrospective analysis for Research and Applications Version 2 (MERRA2)  
59 reanalysis dataset.

$$60 Y_{\text{HONO}}=1.58595*10^9X-1.19123*10^{11} \quad \text{Eq-S1}$$

$$61 Y_{\text{NO}_2}=6.58261*10^8X-1.81889*10^{10} \quad \text{Eq-S2}$$

62  $Y_{\text{NO}}=2.58054*10^8X-1.41507*10^{10}$  Eq-S3

63 Where Y( molecules  $\text{cm}^{-2} \text{s}^{-1}$ ) represents the HONO/NOx fluxes, X ( $\text{W m}^{-2}$ ) represents the light density.

64 A key procedure is to consider the concentration of NPM at each of the  $0.5 \times 0.625^\circ$  grids. Ideally, the  
65 NPM concentration should display spatial distributions as the iron contents, solar light intensity and  
66 underlying surface is different for each region.

67 We have to stress that our experiment is not able to derive the relationship between HONO, NOx  
68 emissions and light density at NPM concentration lower than  $50000 \mu\text{g L}^{-1}$  due to the current limit of  
69 detection. As such, we assume that the environmental NPM concentration is three orders smaller ( $50$   
70  $\mu\text{g L}^{-1}$ ) than the experimental conditions of  $50000 \mu\text{g L}^{-1}$ , and do not consider its spatial heterogeneity  
71 in the model. As a result, the variation of NOx and HONO emissions is driven by the solar radiation.

72 We summarized the distribution of soluble iron concentrations in the waters as shown in Table S3 in the  
73 supplementary information. In order to estimate the environmental NPM and iron concentration  
74 contributed to the formation of reactive nitrogen species, we selected a rationalization parameter  
75 scheme related to the environmental concentration of NPM ( $50 \mu\text{g L}^{-1}$ ) and soluble iron ( $92.48 \text{ nmol L}^{-1}$ ,  
76  $0.025 \text{ mg L}^{-1}$  in our study), which is representative of certain significance.

77 Furthermore, the widespread use of NPM and its capability to release HONO and NOx suggests that  
78 NPM might be an unexplored source of global atmospheric reactive nitrogen (Nr) and hence influence  
79 air quality and climate. Evaluation of such impacts requires a parameterization of global HONO and  
80 NOx fluxes emerging from NPM photochemistry in chemical transport models. However, current  
81 chemical models do not explicitly consider this source of reactive nitrogen species. In this manner, we  
82 are able to generate an hourly dataset of the NOx and HONO fluxes released from NPM chemistry, and  
83 we analyze the amount and spatial pattern of the fluxes in Figure 5. We note that although such  
84 estimation is rather simplified and can be biased in terms of the spatial heterogeneity as we do not  
85 consider the spatial variation of environmental NPM concentrations, our study presents a pioneer  
86 attempt to quantify the global source of HONO and NOx from the NPM photochemistry, as current  
87 chemical models do not explicitly consider this source of reactive nitrogen species. This inventory can  
88 be then applied in chemical models to quantify the environmental impact of HONO and NOx fluxes  
89 emerging from NPM photochemistry.

90 **Text S3. Calculation of Quantum Yields**

91 The quantum yields for reactive nitrogen species formation ( $\Phi$ ), including  $\Phi_{\text{HONO}}$  and  $\Phi_{\text{NO}_x}$  can be  
92 determined by the equation (Eq-S4 and Eq-S5).

93 
$$\Phi_{\text{HONO}} = \frac{J_{\text{NPM} \rightarrow \text{HONO}}}{\int_{\lambda_1}^{\lambda_2} I(\lambda) \sigma(\lambda) d\lambda} \quad \text{Eq-S4}$$

94 
$$\Phi_{\text{NO}_x} = \frac{J_{\text{NPM} \rightarrow \text{NO}_x}}{\int_{\lambda_1}^{\lambda_2} I(\lambda) \sigma(\lambda) d\lambda} \quad \text{Eq-S5}$$

95 Where  $I(\lambda)$  (photons  $\text{cm}^{-2} \text{s}^{-1}$ ) and  $\sigma(\lambda)$  ( $\text{cm}^2 \text{molecules}^{-1}$ ) are the actinic flux spectra of light source and  
96 the absorption cross section of the NPM, respectively (Figure S10).

97 **Table S1.** Measured Photolysis Rate Constants (k) and Half-time ( $T_{1/2}$ ) of NPM in aqueous solution at different  
 98  $Fe^{3+}$  concentrations.

99

| The concentration of $Fe^{3+}$<br>(mg.ml <sup>-1</sup> ) | Kinetic equation           | Rate<br>Constants<br>(k)/min <sup>-1</sup> | Half-time<br>( $T_{1/2}$ )/min | R <sup>2</sup> | Initial pH<br>value |
|----------------------------------------------------------|----------------------------|--------------------------------------------|--------------------------------|----------------|---------------------|
| 0                                                        | $C_t = 0.501e^{-0.00427t}$ | 0.00427                                    | 162.3                          | 0.99438        | 7.3                 |
| 0.1                                                      | $C_t = 0.477e^{-0.00382t}$ | 0.00382                                    | 181.5                          | 0.98757        | 3.4                 |
| 0.25                                                     | $C_t = 0.520e^{-0.00310t}$ | 0.00310                                    | 223.6                          | 0.98065        | 2.9                 |
| 0.5                                                      | $C_t = 0.514e^{-0.00346t}$ | 0.00346                                    | 200.3                          | 0.98869        | 2.6                 |
| 0.8                                                      | $C_t = 0.513e^{-0.00513t}$ | 0.00513                                    | 135.1                          | 0.99064        | 2.4                 |

100

**Table S2.** Quantum Yields ( $\phi$ ) for Photolysis of NPM and NOx at different  $\text{Fe}^{3+}$  concentrations

| <b>The concentration of<br/><math>\text{Fe}^{3+}</math> (mg ml<sup>-1</sup>)</b> | <b>0</b>              | <b>0.1</b>            | <b>0.25</b>           | <b>0.5</b>            | <b>0.8</b>            |
|----------------------------------------------------------------------------------|-----------------------|-----------------------|-----------------------|-----------------------|-----------------------|
| $\phi_{\text{HONO}}$                                                             | $4.48 \times 10^{-5}$ | $1.84 \times 10^{-4}$ | $2.03 \times 10^{-4}$ | $1.59 \times 10^{-4}$ | $1.55 \times 10^{-4}$ |
| $\phi_{\text{NO}_2}$                                                             | $2.03 \times 10^{-5}$ | $6.46 \times 10^{-5}$ | $5.21 \times 10^{-5}$ | $4.71 \times 10^{-5}$ | $4.02 \times 10^{-5}$ |
| $\phi_{\text{NO}}$                                                               | $4.06 \times 10^{-5}$ | $3.35 \times 10^{-5}$ | $2.10 \times 10^{-5}$ | $1.87 \times 10^{-5}$ | $1.40 \times 10^{-5}$ |

101

**Table S3.** The concentrations of soluble iron in water of different region

| <b>Sampling site</b>                                               | <b>Concentration (nmol L<sup>-1</sup>)</b> | <b>References</b>      |
|--------------------------------------------------------------------|--------------------------------------------|------------------------|
| <b>Humic acid-rich coast of the Pacific Ocean</b>                  | 23.1-573.2                                 | Gerringa et al., 2007  |
| <b>Scheldt estuary</b>                                             | 104-536                                    | Batchelli et al., 2010 |
| <b>Peconic Estuary</b>                                             | 9-240                                      | Gobler et al., 2002    |
| <b>Southern Vancouver Island</b>                                   | 0.05 – 0.07                                | Nishioka et al., 2001  |
| <b>Alaskan coastal waters</b>                                      | 0.5-4.1                                    | Lippiatt et al., 2010  |
| <b>the outer bay of Mediterranean coastal waters</b>               | 3.7-25                                     |                        |
| <b>in the inner and middle bay of Mediterranean coastal waters</b> | 9-240                                      | Öztürk et al., 2003    |
| <b>Yamuna River in Mathura</b>                                     | 1.73 mg L <sup>-1</sup>                    | Ahmed et al., 2022     |

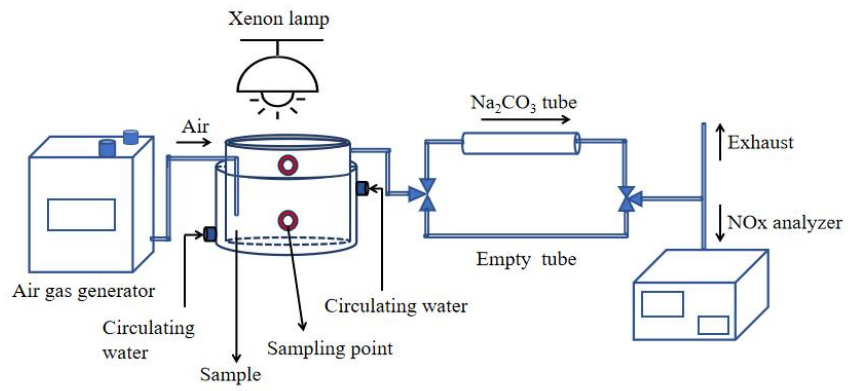

104

105

**Figure S1.** Diagram of the experimental set up



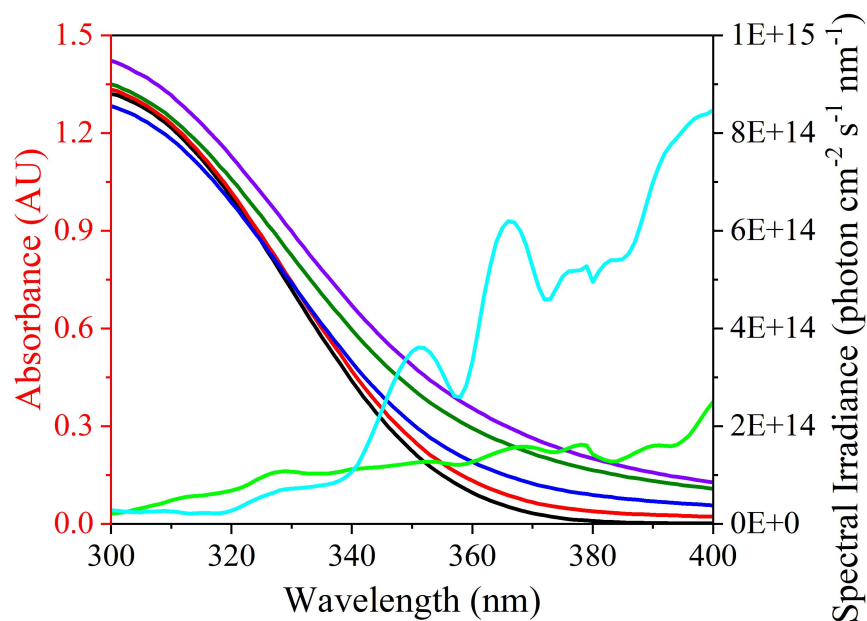

107

108 **Figure S2.** The absorption spectra of NPM ( $0.05 \text{ mg ml}^{-1}$ ) in the absence of  $\text{Fe}^{3+}$  (dark line), and in the presence of  
109 different concentrations of  $\text{Fe}^{3+}$ :  $0.01 \text{ mg ml}^{-1}$  (red line),  $0.025 \text{ mg ml}^{-1}$  (blue line),  $0.05 \text{ mg ml}^{-1}$  (green line) and  
110  $0.08 \text{ mg ml}^{-1}$  (purple line). Comparison of the spectral irradiance of the Xenon lamp (fluorescent light blue line)  
111 and the spectral irradiance of the sunlight (fluorescent light green line) measured by the spectroradiometer  
112 (HP350UVP, China). The spectral irradiance is determined for Kunming (latitude  $24.85285$ , longitude  $102.86016$ )  
113 on July 26 2022 at noon.

114

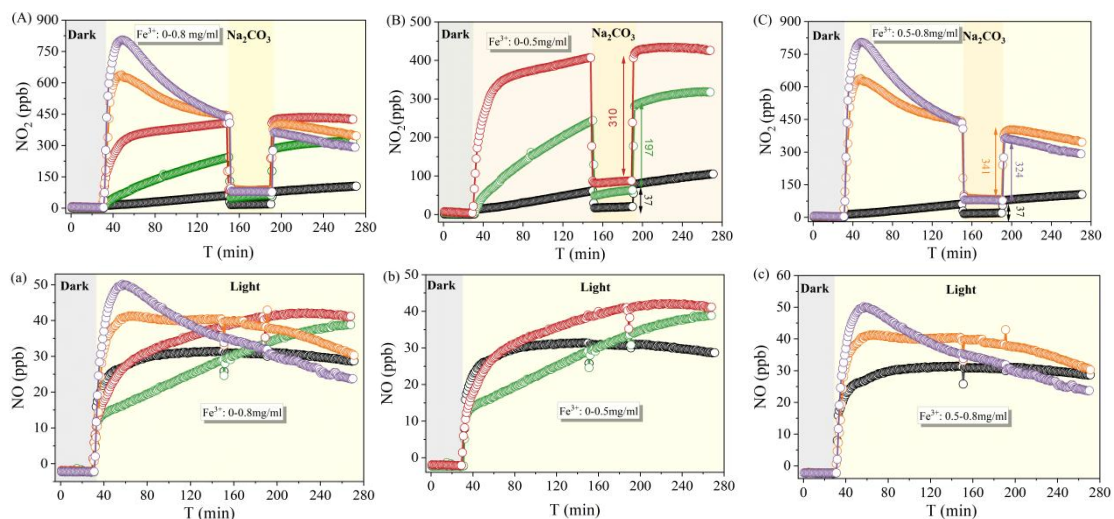

115

116 **Figure S3.** The temporal changes of NO<sub>2</sub>, HONO and NO during the photolysis of NPM (0.5 mg ml<sup>-1</sup>) in the  
 117 absence of Fe<sup>3+</sup> (dark line), and in the presence of different concentrations of Fe<sup>3+</sup>: 0.1 mg ml<sup>-1</sup> (blue line), 0.25 mg  
 118 ml<sup>-1</sup> (red line), 0.5 mg ml<sup>-1</sup> (orange line) and 0.8 mg ml<sup>-1</sup> (purple line). Reaction conditions: irradiation intensity of  
 119 169.4 W m<sup>-2</sup> at 300-400 nm, temperature of 298 K.

120

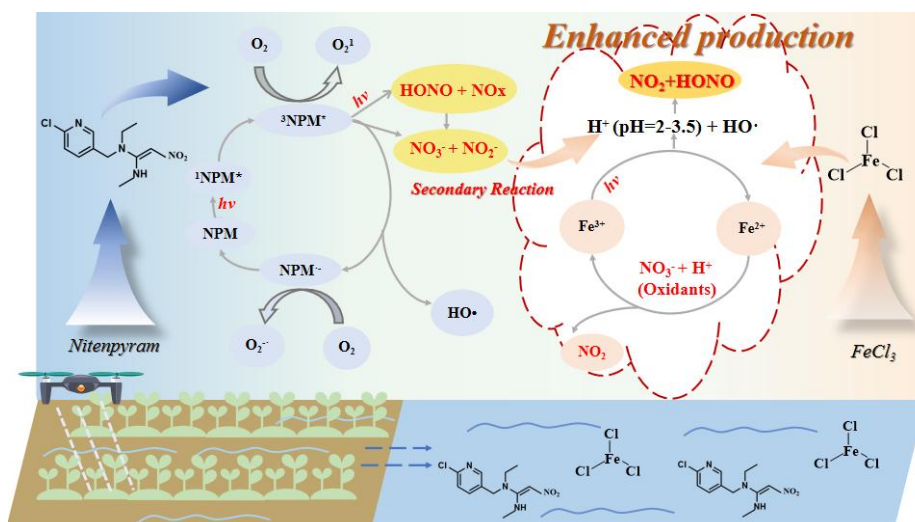

121

122 **Figure S4.** Proposed mechanism of NPM photolysis in the presence of iron ions leading to HONO and NOx  
 123 formation.

124

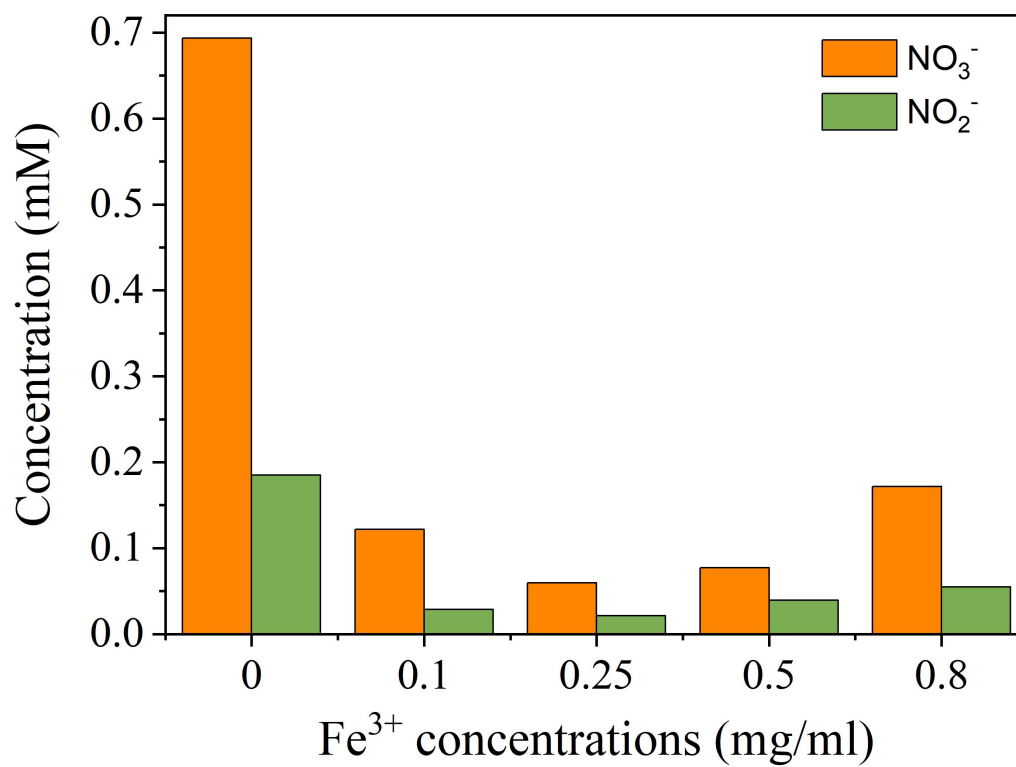

125

126

127 **Figure S5.** The nitrate and nitrite ions concentrations of NPM (0.5 mg ml<sup>-1</sup>) by 2 hours photolysis at different  
128 concentrations of Fe<sup>3+</sup>.

129

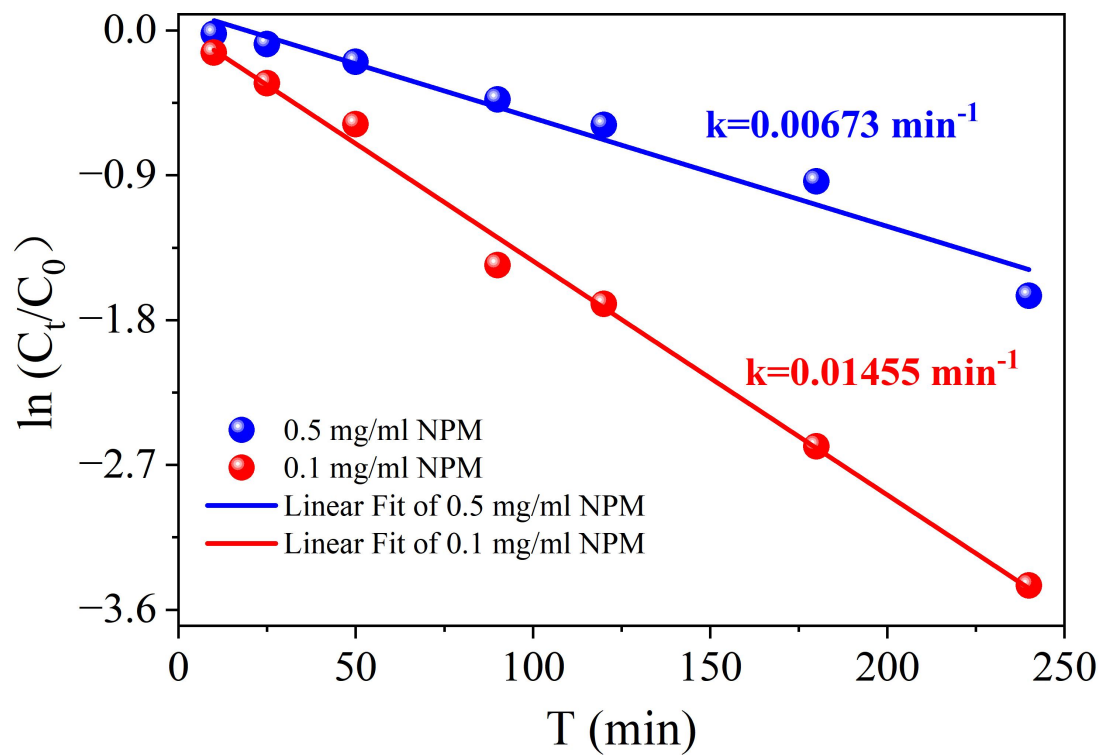

130

131

Figure S6. First-order rates at different NPM concentrations

132

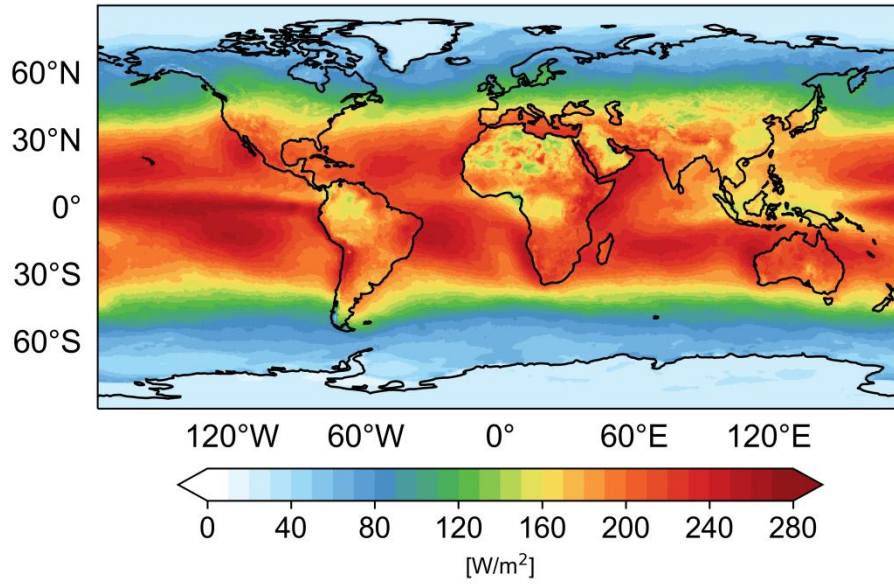

133

134

**Figure S7.** The spatial distribution of solar radiation in the global region.

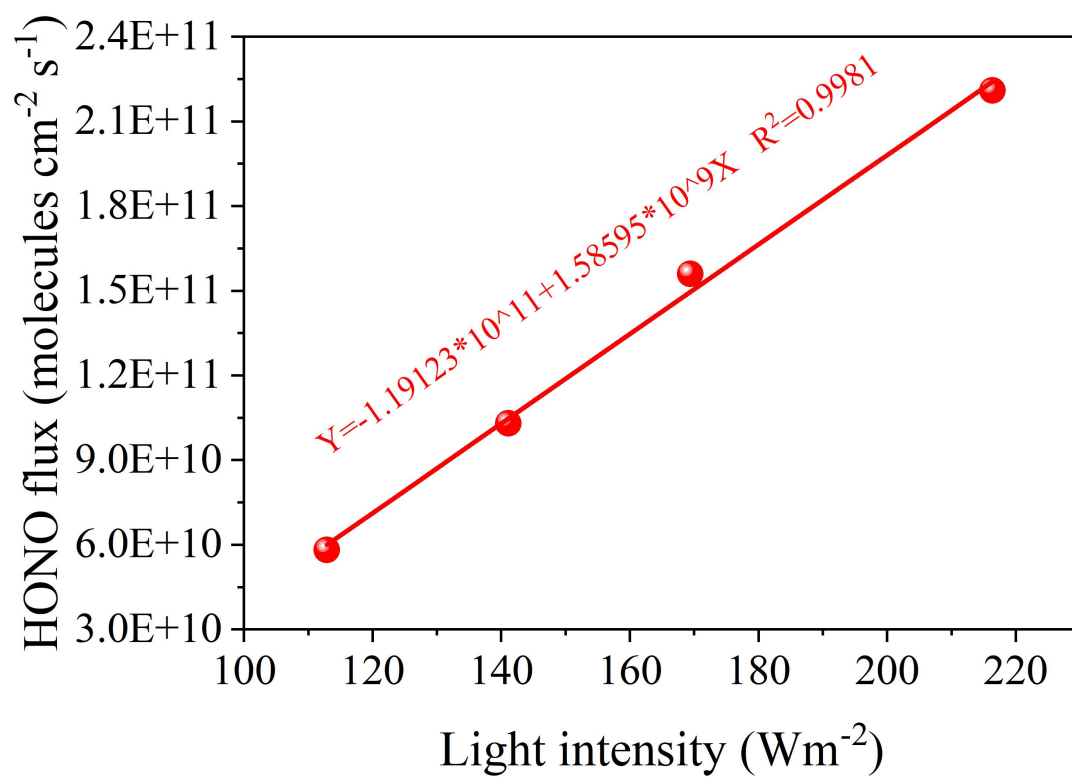

135

136

137 **Figure S8.** HONO flux from NPM photolysis under different light intensity. Conditions: NPM concentration of

138 0.05 mg ml<sup>-1</sup>, Fe<sup>3+</sup> concentration of 0.025 mg ml<sup>-1</sup>, irradiation time of 60 min, temperature of 298 K.

139

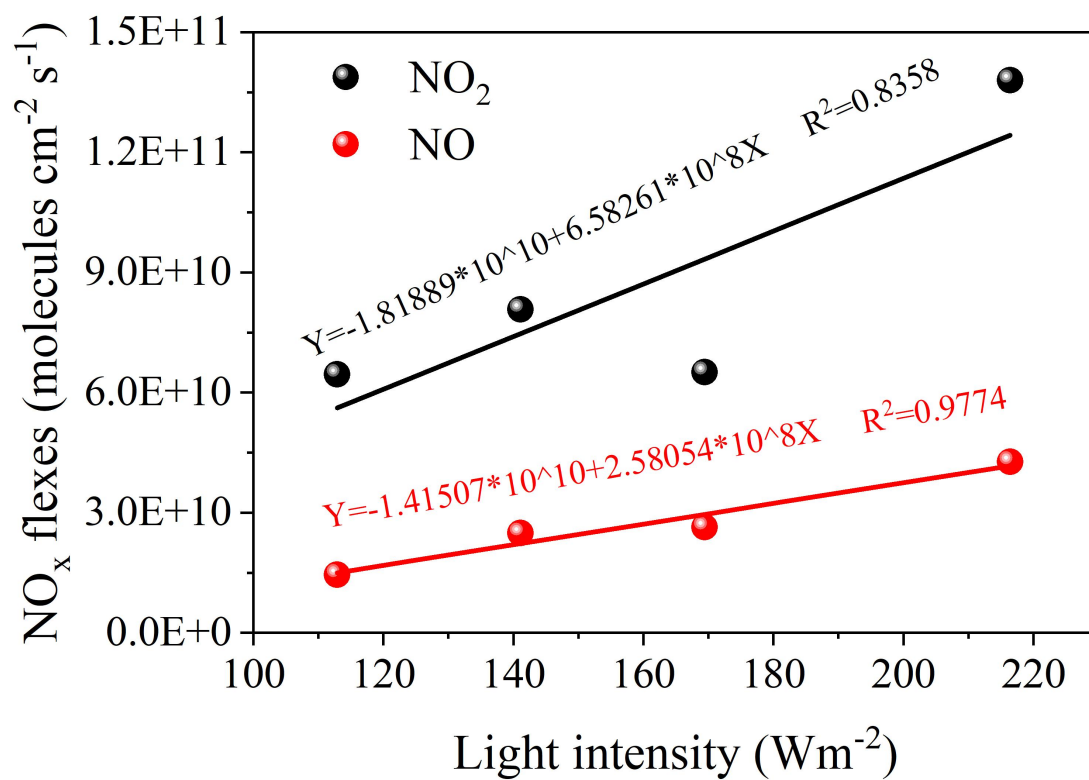

140

141

142 **Figure S9.** NO<sub>x</sub> flux from NPM photolysis under different light intensity. Conditions: NPM concentration of 0.05

143 mg ml<sup>-1</sup>, Fe<sup>3+</sup> concentration of 0.025 mg ml<sup>-1</sup>, irradiation time of 60 min, temperature of 298 K.

144



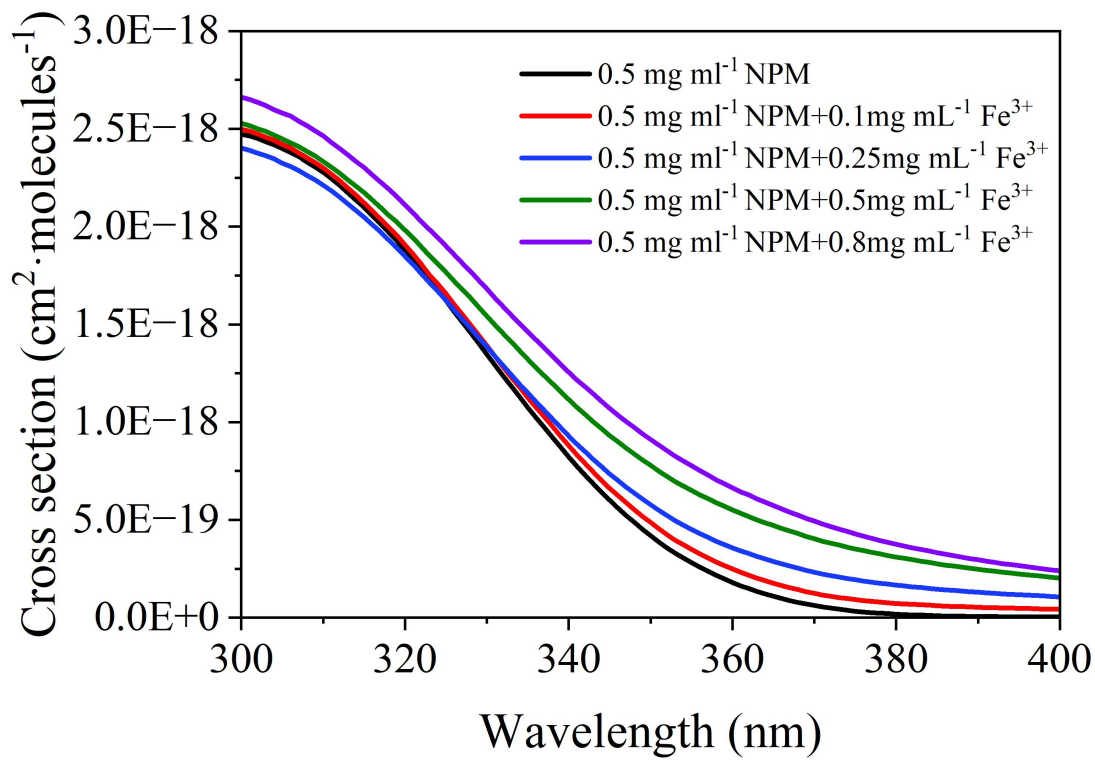

**Figure S10.** Cross section of NPM and NOx at different  $\text{Fe}^{3+}$  concentrations.

## References

- Ahmed, S., Akhtar, N., Rahman, A., Mondal, N. C., Khurshid, S., Sarah, S., Muqtada Ali Khan, M., and Kamboj, V.:  
150 Evaluating groundwater pollution with emphasizing heavy metal hotspots in an urbanized alluvium watershed of Yamuna River, northern India, *Environ. Nanotechnol., Monit. Manage*, 18, 10744, doi:10.1016/j.enmm.2022.100744, 2022.
- Bai, X., Yang, Q., Guo, Y., Hao, B., Zhang, R., Duan, R., and Li, J.: Alkyl halide formation from degradation of carboxylic acids in the presence of Fe(III) and halides under light irradiation, *Water. Res.*, 235, 119842, doi:10.1016/j.watres.2023.119842, 2023.
- 155 Batchelli, S., Muller, F. L. L., Chang, K.-C., and Lee, C.-L.: Evidence for Strong but Dynamic Iron–Humic Colloidal Associations in Humic-Rich Coastal Waters, *Environ. Sci. Technol.*, 44, 8485-8490, doi:10.1021/es101081c, 2010.
- Gerringa, L. J. A., Rijkenberg, M. J. A., Wolterbeek, H. T., Verburg, T. G., Boye, M., and de Baar, H. J. W.: Kinetic study reveals weak Fe-binding ligand, which affects the solubility of Fe in the Scheldt estuary, *Mar. Chem.*, 103, 30-45, doi:10.1016/j.marchem.2006.06.002, 2007.
- 160 Gobler, C. J., Donat, J. R., Consolvo, J. A. and Sañudo-Wilhelmy, S. A.: Physicochemical speciation of iron during coastal algal blooms, *Mar. Chem.*, 77, 71-89, doi:10.1016/S0304-4203(01)00076-7, 2002.
- Lippiatt, S. M., Lohan, M. C., and Bruland, K. W.: The distribution of reactive iron in northern Gulf of Alaska coastal waters, *Mar. Chem.*, 121, 187-199, doi:10.1016/j.marchem.2010.04.007, 2010.
- Lu, Z., Challis, J. K., and Wong, C. S.: Quantum Yields for Direct Photolysis of Neonicotinoid Insecticides in Water:  
165 Implications for Exposure to Nontarget Aquatic Organisms, *Environ. Sci. Technol. Lett.*, 2, 188-192, doi:10.1021/acs.estlett.5b00136, 2015.
- Nishioka, J., Takeda, S., Wong, C. S., and Johnson, W. K.: Size-fractionated iron concentrations in the northeast Pacific Ocean: distribution of soluble and small colloidal iron, *Mar. Chem.*, 74, 157-179, doi:10.1016/S0304-4203(01)00013-5, 2001.
- 170 Öztürk, M., Bizsel, N., and Steinnes, E.: Iron speciation in eutrophic and oligotrophic Mediterranean coastal waters;: impact of phytoplankton and protozoan blooms on iron distribution, *Mar. Chem.*, 81, 19-36, doi:10.1016/S0304-4203(02)00137-8, 2003.
- Wang, Y., Huang, D. D., Huang, W., Liu, B., Chen, Q., Huang, R., Gen, M., Mabato, B. R. G., Chan, C. K., Li, X., Hao, T., Tan, Y., Hoi, K. I., Mok, K. M., and Li, Y. J.: Enhanced Nitrite Production from the Aqueous Photolysis of Nitrate in the  
175 Presence of Vanillic Acid and Implications for the Roles of Light-Absorbing Organics, *Environ. Sci. Technol. Lett.*, 55, 15694-15704, doi:10.1021/acs.est.1c04642, 2021.
